# Supplementary material for: Association of Burnout, Professional Fulfillment, and Self-care Practices of Physician Leaders With Their Independently Rated Leadership Effectiveness
Source: PubMed Central journal article supplement (PMC7298612; doi:10.1001/jamanetworkopen.2020.7961), 2020-06-16
Supplement: jamanetwopen-3-e207961-s001.pdf [file jamanetwopen-3-e207961-s001.pdf]

## Supplementary Online Content

Shanafelt TD, Makowski MS, Wang H, et al. Association of burnout, professional fulfillment, and self-care practices of physician leaders with their independently rated leadership effectiveness. *JAMA Netw Open*. 2020;3(6):e207961.  
doi:10.1001/jamanetworkopen.2020.7961

**eAppendix.** Mayo Clinic Participatory Management Leadership Index  
**eTable.** Leaders' Personal Characteristics and Leadership Behavior Score

This supplementary material has been provided by the authors to give readers additional information about their work.

**eAppendix. Mayo Clinic Participatory Management Leadership Index**

|                                                                                                                            |
|----------------------------------------------------------------------------------------------------------------------------|
| <i>To what extent do you agree or disagree with each of the following statements about (name of immediate supervisor)?</i> |
| Holds career development conversations with me <sup>1</sup>                                                                |
| Empowers me to do my job <sup>1</sup>                                                                                      |
| Encourages employees to suggest ideas for improvement <sup>1</sup>                                                         |
| Treats me with respect and dignity <sup>1</sup>                                                                            |
| Provides helpful feedback and coaching on my performance <sup>1</sup>                                                      |
| Recognizes me for a job well done <sup>1</sup>                                                                             |
| Keeps me informed about changes taking place at <b>Name of organization</b> <sup>1</sup>                                   |
| Encourages me to develop my talents and skills <sup>1</sup>                                                                |
| Overall, how satisfied are you with (name of immediate supervisor) <sup>2</sup>                                            |

<sup>1</sup> response options: 5 =strongly agree, 4=agree, 3=neither agree nor disagree, 2=disagree, 1=strongly disagree; NA=don't know/not applicable

<sup>2</sup> response options: 5=very satisfied, 4=satisfied, 3=neither satisfied nor dissatisfied, 2=dissatisfied, 1=very dissatisfied

Scoring: sum 1-5 score for each of 9 items to generate a total score (range 9-45). Total scores can be normalized to a 0-10 scale by calculating the mean 1-5 score for the leadership items answered (for those answering at least 7 items), subtracting 1, and multiplying by 2.5.

**Used with permission, copyright Mayo Clinic.**

eTable. Leaders' Personal Characteristics and Leadership Behavior Score

| Characteristics   | Leader Behavior Score <sup>1</sup><br>(Mean +/- SD) | P-Value |
|-------------------|-----------------------------------------------------|---------|
| Leader Gender     |                                                     |         |
| Men (N=38)        | 7.79 +/- 0.94                                       | 0.677   |
| Women (N=16)      | 7.63 +/- 1.35                                       |         |
| Leader Age        |                                                     |         |
| 40-49 (N=5)       | 7.96 +/- 1                                          | 0.879   |
| 50-59 (N=23)      | 7.8 +/- 0.92                                        |         |
| ≥60 (N=19)        | 7.73 +/- 0.96                                       |         |
| Leader Work hours |                                                     |         |
| Q1: <60 (N=19)    | 7.71 +/- 0.94                                       | 0.927   |
| Q2: 60-68 (N=10)  | 7.94 +/- 0.85                                       |         |
| Q3: 68-75 (N=15)  | 7.65 +/- 1.07                                       |         |
| Q4: 75-120 (N=12) | 7.71 +/- 1.49                                       |         |

<sup>1</sup> Independently rated by the physicians the leader supervised
